# Supplementary material for: Retrospective study: the value of GDF-15 and conventional markers in combination for clinical diagnosis of lung cancer
Source: PeerJ journal article supplement (doi:10.7717/peerj.20281), 2025-10-27
Supplement: Table_S1.xlsx [file Table_S1.xlsx]

## Sheet: Sheet1
Subtype	Gender	Age	[CEA]	CA125	[CA15-3]	CA19-9	CYFRA21-1	[SCC]	NSE	CA72-4	GDF15	Stage
Adenomatous	Male	59	1.62	15.1	19.7	9.34	1.47	1.29	14.9	1.5	799.621	cT2N3M1 IVb
Adenomatous	Female	71	1.29	15.4	16.7	12.7	1.31	0.66	15.9	2.3	1027.12	pT3N1M0,IIIA
Adenomatous	Male	50	15.2	9.25	8.83	7.35	1.12	1.74		2.5	1012.37	cT1cN0M1a IVA
Adenomatous	Male	59	5.96	8.81	27.9	8.18	1.35	1.81		2.6	1605.22	cT4N0M1 IVa
Adenomatous	Female	69	6.31	75.5	24	<2.00	4.2	1.01	20.6	3.7	2568.49	T4N3M1c,IVB
Adenomatous	Male	48	5.08	23.4	11.9	6.45	6.25	0.67		4.1	1450.64	cT1N3M1c IVb
Adenomatous	Male	73	2.38	16.8	34.3		1.87	0.73		5.4	6056.8	cTxN3M1c IVB
Adenomatous	Male	67	14.1	34.8	30.7	2.07	12.7	1.76	13.4	8.7	2533.83	cT2N3M1c IVB
Adenomatous	Male	58	24.6	357	115	16.2	12.6	0.63	16.8	8.7	3970.92	cTxN3M1c IVB
Adenomatous	Male	54	2.12	10.4	8.55	<2.00	2.91	3.05	15.2	9.9	1620.63	cT2bN3M0 IIIb
Adenomatous	Male	58	6.76	88.6	82.1	18.5	3.58	1.29	22.3	12.6	6152.69	cTxN3M1c IVB
Adenomatous	Male	66	115	1144	66.5		25.7			15.2	6163.55	cTxN3M0 IIIb
Adenomatous	Male	48	18.6	691	293	24.6	24.5	2.89	39.8	18	7199.41	cT2N3M1c IVB
Adenomatous	Male	57	1.47	23.3	11.4	6.57	0.47	1.06	14.2	19.2	1133.83	cT1bN2M0 IIIA
Adenomatous	Female	48	82.4	77.1	62.5	1399	6.73	7.4		20.1	6610.54	cT3N2M1 IVB
Adenomatous	Female	53	66.4	388	26.5	6.46	3.65	0.49	12.6	27.1	4981.04	rT4N3M1c，ⅣB
Adenomatous	Male	52		13.1	9.18	6.12	1.75	0.8	9.65		1123.66	cT1N2MO IIIA
Adenomatous	Female	51	3.1				1.53		11.5		4307.83	pT2aN2M0 IIIA
Adenomatous	Female	68	2.12				1.29		12.1		3168.55	pT1N2M0
Adenomatous	Male	52	6.58				2.05		12.4		2133.74	ypT2N2M0
Adenomatous	Male	51	1.98				3.69		12.7		728.489	pT1N0M0，Ia2
Adenomatous	Male	66	13.5				1.62		12.8		2599.78	cT1cN3M0 IIIB
Adenomatous	Female	50	0.87				1.75	2.21	13.1		369.775	pT1cN0M0
Adenomatous	Male	52					1.36		13.1		1006.71	cT2bN3M1a，ⅣA
Adenomatous	Female	58	1.26				1.35		13.3		1148.69	pT1N1M0 IIB
Adenomatous	Female	56	1.51				1.5		13.4		881.529	cT1N0M0 IA
Adenomatous	Female	56	1.51				1.5		13.4		1217.11	pTisN0M0 0
Adenomatous	Female	52	202	31.8	127	<2.00	2.61		13.5		738.846	cTxNxM1,IV
Adenomatous	Male	65	3.64				0.93	0.88	13.9		375.897	pT2N2M0 IIIA
Adenomatous	Male	60	1.82				1.28		14		745.573	pT2N1Mx
Adenomatous	Male	60	1.82				1.28		14		1287.84	pT2aN1M0 IIB
Adenomatous	Female	48	2				1.15	1.32	14.1		934.58	pT1cN0M0
Adenomatous	Male	54	2.09				3.23	0.89	14.3		1605.4	pTxN3M0
Adenomatous	Female	41	0.96				1.91		14.3		1222.23	pT1cN0M0
Adenomatous	Female	57	1.45				1.94		14.4		1279.56	pT1N0M0 Ia
Adenomatous	Male	66	1.05				2.13		14.5		3434.88	pT1N0M0 Ia
Adenomatous	Male	48	6.81			5.15	3.61		14.5		833.638	cT1N3M1c IVb
Adenomatous	Female	61	5.13				4		14.6		1450.15	cT1N0M1，IV
Adenomatous	Female	64	2.36				1	1.54	14.7		991.504	cT4NxM1 IV
Adenomatous	Male	60	5.61				1.28		15		3028.45	pT1bN0M0
Adenomatous	Female	65	1.45				2.06		15.3		1733.03	pT1aN0M0 Ia1
Adenomatous	Female	53	1.15				1.56	0.87	15.4		2341.44	pTisN0M0 IA
Adenomatous	Female	67	3.47				1.75		15.4		3741.84	pT1bN0M0 IA2
Adenomatous	Female	45	244				2.08		15.4		3958.55	cT2aN0M1 IVB
Adenomatous	Male	77							15.5		4248.04	pT2N0M0 IB
Adenomatous	Female	69	1.73				1.72		15.8		1345.25	pT1N0M0
Adenomatous	Female	69	1.73				1.72		15.8		1608.94	pT1N0M0
Adenomatous	Female	47	2.36				2.68		16		2132.17	T1bN3M0 IIIA
Adenomatous	Male	57	4.3	20.6			2.37		16.1		620.521	cT2N3M1 IV
Adenomatous	Male	53	3.21				1.83		16.3		1622.12	pT2N0M0 Ib
Adenomatous	Male	60	1.27				1.98		16.3		1825.54	cT1N0M0 IA
Adenomatous	Female	61	2.48				1.4		16.5		2018.27	pT1bN0M0 IA2
Adenomatous	Male	73	3.59				3.15		16.5		1891.39	cT2N1M1 IV
Adenomatous	Male	70	6.32	16.3	27.9	6.86	6.99		16.7		2807.47	cT2N3Mx rM1 IV )
Adenomatous	Female	35	0.51						16.7		572.02	cTxN1M1 IV
Adenomatous	Male	70	9.32				1.26	4.73	16.9		2816.29	pT2N2M0
Adenomatous	Female	61	2.66				1.33		16.9		6236.08	pT1N0M0 IA
Adenomatous	Female	63	0.56				1.23		17		1559.09	cT1N0M0
Adenomatous	Female	71	0.97				3.97		17		3789.84	pT1aN0M0 Ia1
Adenomatous	Male	67	3.01				1.4	0.84	17.9		1477.78	pT1aN0M0,IA
Adenomatous	Male	62	1.89	10			1.77		18		2399.05	cT1cN0M1c IVb
Adenomatous	Male	44	2.72				1.48	1.92	18.2		1318.5	cT3N2M1 IV
Adenomatous	Male	75	2.74						18.2		7311.68	T2aN0M0 Ib
Adenomatous	Female	73	25.8				1.78		18.3		5131.76	cT4N2M1c ⅣB
Adenomatous	Male	42	2.6				1.15		19		1836.55	cT4N3M1 Ⅳb
Adenomatous	Male	33	1.68				1.44		19		1822.57	cT3N3M1 IV
Adenomatous	Female	69	19	895	34.4	>10000.00	8.38		19.1		3184.31	cT3N3M0 IIIC
Adenomatous	Female	69	23.4				3.58		19.7		2087.06	TxN3M1 IV
Adenomatous	Male	63	29.4				4.14		20.5		3989.33	ypT2N2M0 IVa
Adenomatous	Male	56							20.5		3996.16	pT2BN0M0
Adenomatous	Male	49	416				4.63		21		923.15	cT2aN3M0，ⅢB
Adenomatous	Female	61	3.9				5.71	1.21	21.1		3615.68	pT4N0M0 IIIA
Adenomatous	Female	54	1.25	17.3	10	12.2	1.12		21.6		2318.64	pT2N0M0 ⅠB
Adenomatous	Male	80	279				26.1		21.6		3247.13	cT4N3M1a ⅣA
Adenomatous	Male	60	1.52				1.29		21.7		2097.76	pT1N0M0 IA
Adenomatous	Male	58	1.74				0.75	0.96	21.8		2040.24	cT4N2M0 IIIB
Adenomatous	Male	62	8.81				2.39	0.71	22.1		3081.37	cT3N2M1
Adenomatous	Female	75	2.58				1.13	<0.10	22.6		1817.11	cT1N2M0 IIIA
Adenomatous	Female	50	155				11.6	1.26	25.5		5654.22	cT3N2M1 ⅣB
Adenomatous	Male	61	115			<2.00	612		211		4285.87	cT1N0M0 IA
Adenomatous	Female	47	7.27			11	13.4	0.64			2472.14	T1bN3M0 IIIA
Adenomatous	Female	49	1.04				1.67	0.66			3632.42	pT2N2M0, IIIa
Adenomatous	Female	44	1.17				1.88	0.66			3669.26	cT2N0M1 IVB
Adenomatous	Female	65	1.99	13	7.03		2.1	0.67			6019.76	rT0N3M0 IIIA
Adenomatous	Female	66	7.96				1.55	0.84			995.89	cT2N1M1 IVB
Adenomatous	Male	53				1.32		0.86			954.176	cT3N3M1 IV
Adenomatous	Male	78	631				5.37	1.59			4910.93	cT4N3M1 IV
Adenomatous	Male	74	4.78				1.85	1.88			4863.05	pT1N0M0
Adenomatous	Male	75	16.4				5.19	4.02			7383.61	pT1N2M0,IIIA
Adenomatous	Female	42	1	17.2	21.1	14.1	1.05				2411.88	cT3N3M1 IV
Adenomatous	Male	51	84.7				1.18				1400.66	cT4N3M1c ⅣB
Adenomatous	Female	40	12.6	40.4	39.9	7.86	1.24				1646.44	pT1N0M0 Ia
Adenomatous	Female	62	2.08				1.48				432.664	pT1N0M0
Adenomatous	Male	56	2.04	17.4			1.54				827.868	pT2N1M0 IIB
Adenomatous	Female	70	1.23				1.69				1078.4	pT1N0M0 IA
Adenomatous	Female	69	22.7				1.75				3383.41	cT2N2M1
Adenomatous	Female	31	1.04				1.87				655.044	cT4N3M1c IVB
Adenomatous	Female	59	1.87	18.2	19.4		2.28				566.887	cT2N3M1
Adenomatous	Male	66	13	20.9			2.34				1757.22	pT4N2M1 IV
Adenomatous	Female	65	1.77				2.52				539.465	pT2N0M0 Ib
Adenomatous	Female	52	0.96				2.59				1775.4	pT1N2M0 IIIA
Adenomatous	Female	50	298				2.93				3568.1	cT4N3M1 IV
Adenomatous	Male	67	2.98	9.45			3.27				3416.04	pT4N0M0
Adenomatous	Female	64	4.19			22.9	3.72				1559.99	cT2N2M1b IVa
Adenomatous	Male	72	6.11				3.92				4462.95	cT1cN0M1c IVB
Adenomatous	Female	57	27.5				4.29				5246.6	cT3N1M1 IVB
Adenomatous	Male	53	17.8				4.7				4296.98	cT1aN3M1 IV
Adenomatous	Female	67	1.55				15				1396.65	cT2N1M1c IVB
Adenomatous	Male	37					26.8				6208.85	cT4N3M1c ⅣB
Adenomatous	Female	59					30.5				5309.53	rTxN2M1 IVB
Adenomatous	Male	50									990.773	cT3N0M1c IVB
Adenomatous	Female	47									2552.84	cT1N3M1c IVB
Adenomatous	Male	66									4745.68	pT4N1M0
Adenomatous	Male	66	3.27	11	17.5	<2.00	3.74	0.83		4.8	1951.77	cT2aN2M1b IVA
Adenomatous	Male	59	24.5	446	60.5	10.9	2.77	1.07	15.8	7.7	3034.04	cT2aN3M1c IVB
Adenomatous	Female	46						1.48	12		2018.78	pT2bN0M0 IIA
Adenomatous	Female	62	1.11				2.45		12.4		547.361	cT1N0M0
Adenomatous	Female	65	1.91				3.37		13.1		3316.99	pT1bN0M0 IA2
Adenomatous	Male	76	7.37				4.47		14.5		2888.4	pT2N2M0 IIIA
Adenomatous	Male	68	2.24				1.97	0.96	14.6		7220.4	cT2N3M0 IIIB
Adenomatous	Male	53	2.7				2.38		14.6		2144.16	ycT4N3M1b IVA
Adenomatous	Female	53					0.83		15.2		642.067	pT2aN0M0 IB
Adenomatous	Female	63	1.26			9.14	1.24		16.9		1352.83	T2N0M0 IB
Adenomatous	Female	55					3.37		21.6		3679.82	cTxN3M1 ⅣB
Adenomatous	Female	58	4.28				1.63	0.79	25.4		1210.3	pT2aN2M1 IV
Adenomatous	Female	65	12				5	0.75			2953.51	cT4N3M1 IV
Adenomatous	Male	67	129	106			4				7804.82	cT2N2M1 IV
Adenomatous	Male	66	4.36				7.88				2920.68	rT4N3M1 IV
SCLC	Male	57	2.48	10.7	14.6	10.4	2.88	1.54		24.4	2740.92	cT1N1M0，IlB
SCLC	Male	72	4.12	30.3	7.98	27.6	1.18	0.8		<1.5	3119.94	cT4N3M1b IVa
SCLC	Female	72	1.28				2.98	0.64	12.3		1341.62	cT4N3M0 IIIC
SCLC	Male	53	7.62				2.01	1.34	12.4		1480.69	cT3N3M1 IV
SCLC	Male	66	1.78				2.34		13.2		1907.73	cT1cN0M0，IA
SCLC	Male	80	2.57			20.8			13.6		2963.01	cT3N2M0 IIIB
SCLC	Female	54	2.79				1.9		14.1		860.575	pT2N2M0 IIIA
SCLC	Female	54	2.79						14.1		1386.76	cT1N0M0
SCLC	Female	71	3.74				1.26	0.66	14.8		1823.29	cT3N2M1
SCLC	Male	55	2.19						15.1		477.047	cT2N2M1b IVA
SCLC	Male	54	1.13				1.03	0.45	16.1		694.034	cT4N3M1c IVB
SCLC	Male	72	3.09				1.29	1.62	16.9		4126.88	cT1bN2M1
SCLC	Male	57	7.6					1.16	18		3313.19	cT4N2M1 IVB
SCLC	Male	68	3.2				2.91		19.8		2231.91	cT3N3M1,IV
SCLC	Male	69	39.2				3.32		20.5		2395.18	T4N3M1 IVA
SCLC	Male	62	1.92				6.41		21.2		1561.68	cT3N3M1 IV
SCLC	Male	78	8.16				2.46		22.8		3462.12	cT2aN3M1 Ⅳ
SCLC	Female	65	1.33				2	0.93	28.5		2369.78	cT4N3M1 IVB
SCLC	Male	64	128				48.3	0.91	61.9		3395.36	cT4N2M1c ⅣB
SCLC	Male	34	2.06				1.38	0.84			764.334	cT2aN0M0
SCLC	Male	70	2.13				1.17	0.99			1150.54	T2N3M0
SCLC	Male	36	1.58		7.76	12.8	0.7	1.04			350.949	cT4N2M1c IVb
SCLC	Male	70	523				1.75	1.17			2494.81	cT3N1M1 IV
SCLC	Male	64	2.92				3.28	1.24			1695.42	cT2N2M1c IVB
SCLC	Male	68	4.26				11.8	1.38			2589.71	cT4N3M1 IV
SCLC	Male	76	1.33				2.51	1.49			1837.65	T4N3M1 IVA
SCLC	Male	53	4.55				1.96				381.277	pT2aN2M1 IV
SCLC	Male	59	2.8				2.23				1682.83	cT3N2M0 IIIB
SCLC	Male	65	16.8				2.31				5814.98	rT2N3M1 IV
SCLC	Male	69	1.89	23.2			2.32				1929.44	cT2N0M1 IV
SCLC	Male	52	112				4.41				1743.94	cT4N1M1 IV
SCLC	Male	63	15.9			3.16					6637.38	cT3N1M1 IVB
SCLC	Male	60	4.03			14.6	2.95	0.63	12.3		1151.18	cTxN2M0
SCLC	Male	52	7.6				2.53	0.94	14.3		4599.93	cT4N2M1,IVA
SCLC	Male	76	1.33				2.51	1.49	18.2		2389.37	T4N3M1 IVA
SCLC	Female	63	1687						138		7147.26	cT4N3M1 IV
SCLC	Female	52	1.31				0.69				884.646	cT3N2M1 IVA
Squamous	Female	77					4.21		15.2		2561.56	pT3N0M0，IIB
Squamous	Female	65	4.66	56.6			5.95	0.93			4187.65	cT4N3M1b ⅣB
Squamous	Male	56	1.3	12.5	12.3	6.28	2.24	0.71	20.3	1.7	1823.23	cT3N2M0 IIIB
Squamous	Male	75	2.91	29.3	20	10.5	4.41	3.15		3.3	2044.6	cT4N0M0 IIIa
Squamous	Male	58	4.7	15.6	8.47	20.4	1.14	1.62		5.1	1383.57	cT2bN2M0 IIIA
Squamous	Male	62	2.97	3	10.2	18.3		0.78		<1.5	524.407	pT2aN0Mx
Squamous	Male	58	1.44		11.3	13.1	1.47	1.17		<1.5	1286.4	ypT3N0M0 IIB
Squamous	Male	76	2.55	8.72	18.2	29.8	0.94	1.67		<1.5	3581.63	cT1N2M0
Squamous	Female	79	2.77				20.6	9.08	7.76		1580.06	cT3N2M0 Ⅲb
Squamous	Male	59	2.78				1.6		9.53		977.537	ypTxN0M0
Squamous	Male	65	11.3				6.28	3.75	10		2980.51	cT3N2M0 ⅢB
Squamous	Male	72	15.6				1.47	0.77	10.2		926.909	cT4N1M1 IV
Squamous	Male	72	1.3				1.37	1.49	13		3609.35	cT2N3M0 IIIb
Squamous	Male	55	1.98				3.79		15.3		2483.88	cT2N2M1 Ⅳ
Squamous	Male	54	3.89				9.99	2.88	15.8		2480.58	cT4N2M0)
Squamous	Male	56	3.59				1.34	4.19	15.8		1452.6	cT3N3M1
Squamous	Male	65	2.55				2.8		16.6		1122.6	cT4N0M0，ⅢA
Squamous	Male	66	4.39				2.76	1.65	16.7		1971.31	cT4N2M0 IIIB
Squamous	Male	57					3.88		17.6		6664.15	cT2N2M1 Ⅳ
Squamous	Male	65	5.86				4.33	18.4	19.7		3707.39	T4N3M1
Squamous	Male	69	7.2	20.2		13.6	5.05	3.18	21.8		4662.38	cT2bN0M0 ⅡA
Squamous	Male	60	4.34				1.69		21.8		3220.89	ypT3N0M0
Squamous	Male	64	3.25			1.69	1.63		27.1		2552.2	pT1cN0M0 IA
Squamous	Male	60	7.24				5.5		36.4		4213.37	cT2N2M0 IIIA
Squamous	Male	66	20.6				9.62	2.6	50.4		1473.82	cT3N2M0
Squamous	Male	71	5.57				4.05	0.42			836.128	cT4N1M0 III
Squamous	Male	75	2.34			6.88		1.04			673.11	cT3N0M0 IIB
Squamous	Male	59	1.7				5.78	1.19			6076.07	cT4N3M0，IIIC
Squamous	Male	70	1.94				4.31	1.31			1340.1	cT4N2M1 IV
Squamous	Male	76	4.4		27.5		3.93	2.83			4966.13	cT4N0M0,IIIa
Squamous	Male	70	4.42					3.03			1140.4	rT4NxM1
Squamous	Male	82	2.99				5.44	4.27			3735.75	cT2N2M0 IV
Squamous	Male	75	5.84				6.62	4.31			911.74	cT2aN3M1 IVB
Squamous	Male	65	4.83				2.42				3389.63	cT2bN0M0 IIa
Squamous	Male	65	2.3				2.46				1036.42	cT4N2M0 IIIB
Squamous	Male	73	3.17				2.84				957.767	cT4N0Mx
Squamous	Male	61							13.6		6758.45	rT1N3M1 Ⅳ
Squamous	Male	79					4.58		18.2		3929.9	cT2aN0M0 IB
Squamous	Male	74	15.8				10.6	2.02	20.6		2080.33	cT2N3M1 IV
Squamous	Male	69									1548.12	cT4N2M1 IVA
